# Supplementary material for: High electrocatalytic performance inspired by crystalline/amorphous interface in PtPb nanoplate
Source: Royal Society of Chemistry journal article supplement (doi:10.1039/c8nr02527d), 2018-01-01
Supplement: c8nr02527d1.pdf [file c8nr02527d1.pdf]

## Supporting information

### High Electrocatalytic Performance Inspired by Crystalline/Amorphous Interface in PtPb Nanoplate

Yanxia Liang, Yingjun Sun, Xinyu Wang, Engang Fu\*, Jian Zhang, Jinlong Du, Xiaodong Wen\*, Shaojun Guo

#### Figures

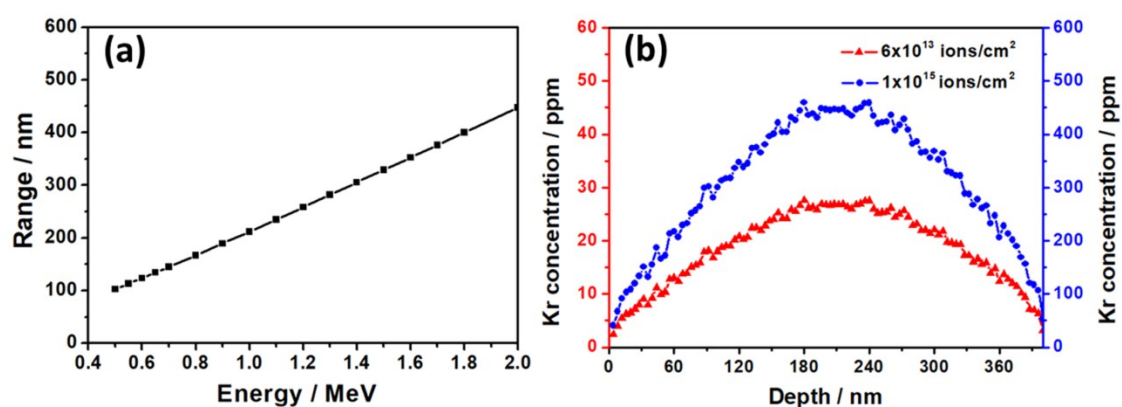

**Fig. S1.** (a) Relationship between the range and energy of Kr<sup>3+</sup> ions. (b) The depth profile of Kr concentration obtained from SRIM simulation of PtPb subjected to Kr<sup>3+</sup> ion irradiation at 1 MeV with a total fluence of  $6 \times 10^{13}$  ions/cm<sup>2</sup> and  $1 \times 10^{15}$  ions/cm<sup>2</sup>.

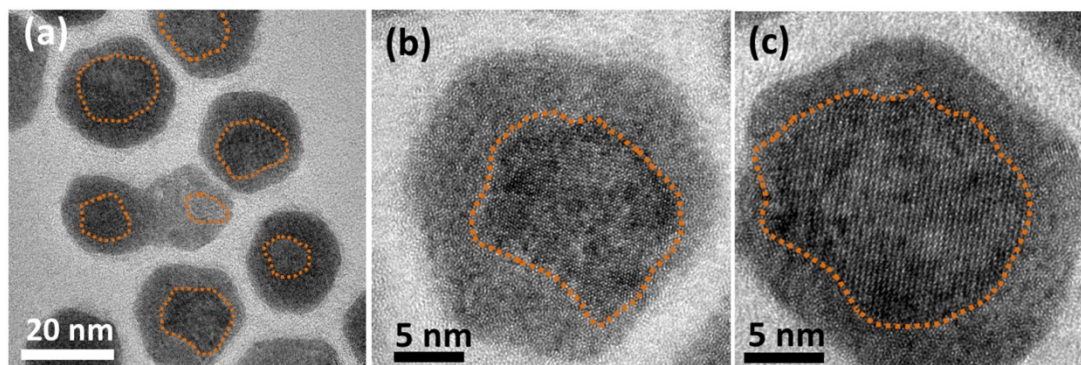

**Fig. S2.** TEM images of PtPb NP samples irradiated by Kr ions with dose of

$6 \times 10^{13} \text{ ions}\cdot\text{cm}^{-2}$ . (a) Overview TEM image containing multiple ion-irradiated PtPb NPs. (b)-(c) TEM images of typical ion-irradiated PtPb NPs. The PtPb NPs contain crystalline phase and amorphous phase simultaneously, and the crystalline region is surrounded by the amorphous region to form interface. The interface of crystalline phase and amorphous phase are marked by dotted line.

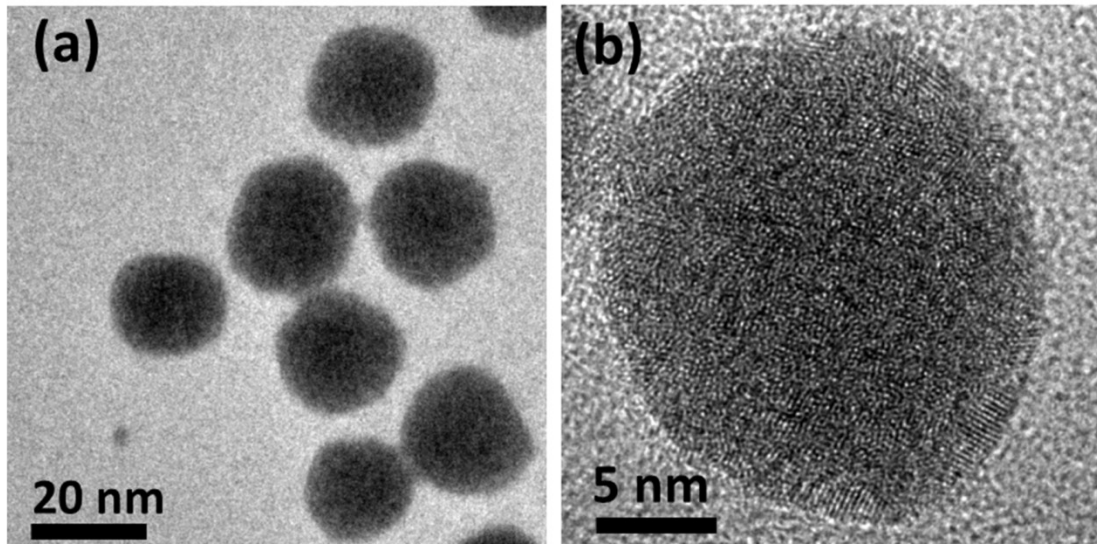

**Fig. S3.** TEM images of PtPb NP samples irradiated by Kr ions with dose of  $1 \times 10^{15} \text{ ions}\cdot\text{cm}^{-2}$ . (a) Overview TEM image containing multiple ion-irradiated PtPb NPs. (b) TEM image of typical ion-irradiated PtPb NP. The PtPb NPs are almost amorphous

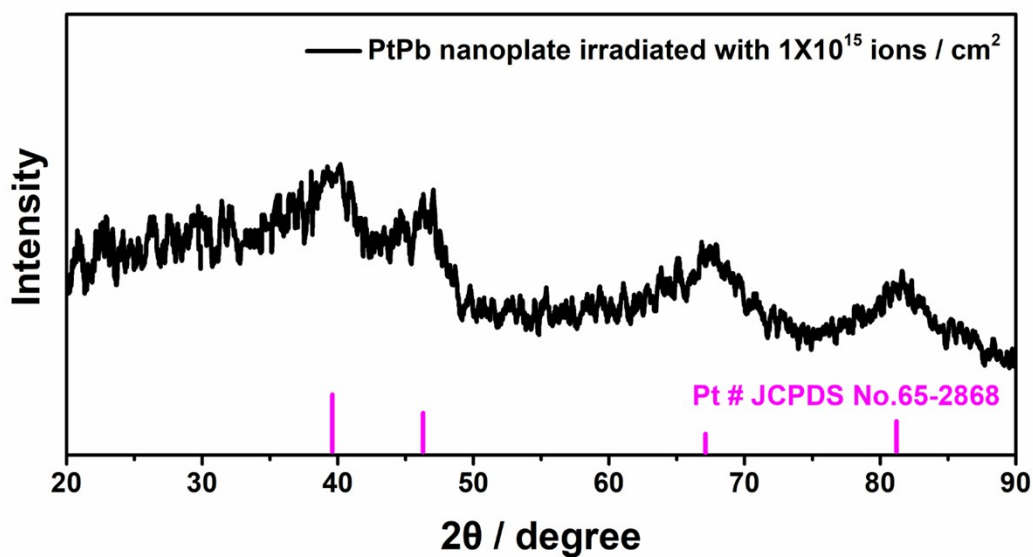

**Fig. S4.** PXRD patterns of PtPb NPs irradiated with the dose of  $1 \times 10^{15} \text{ ions}\cdot\text{cm}^{-2}$ .

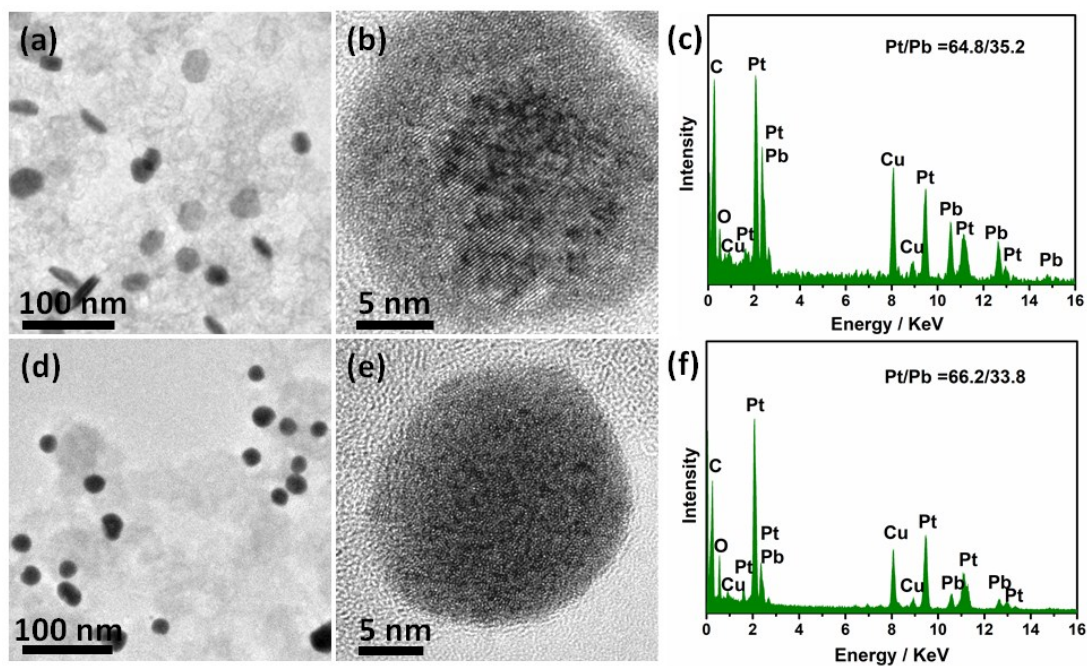

**Fig. S5.** (a) TEM and (b) HRTEM images of PtPb-CA /C NPs after electrochemical tests. (c) EDS result of after-electrochemical-tests PtPb-CA /C NPs showing that the atomic ratio (Pt:Pb) is 64.8/35.2. (d) TEM and (e) HRTEM images of PtPb-A /C NPs after electrochemical tests. (f) EDS result of after-electrochemical-tests PtPb-A /C NPs showing that the atomic ratio (Pt:Pb) is 66.2/33.8.

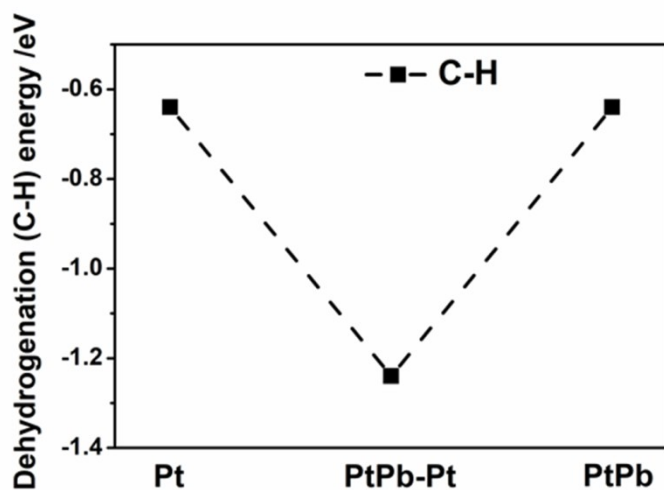

**Fig. S6.** Dehydrogenation energy in MOR represented by  $\text{CH}_3\text{O}^* \rightarrow \text{CH}_2\text{O}^* + \text{H}^*$  (breaking C-H bond) in Pt surface, PtPb-Pt interface (C/A interface) and PtPb surface.

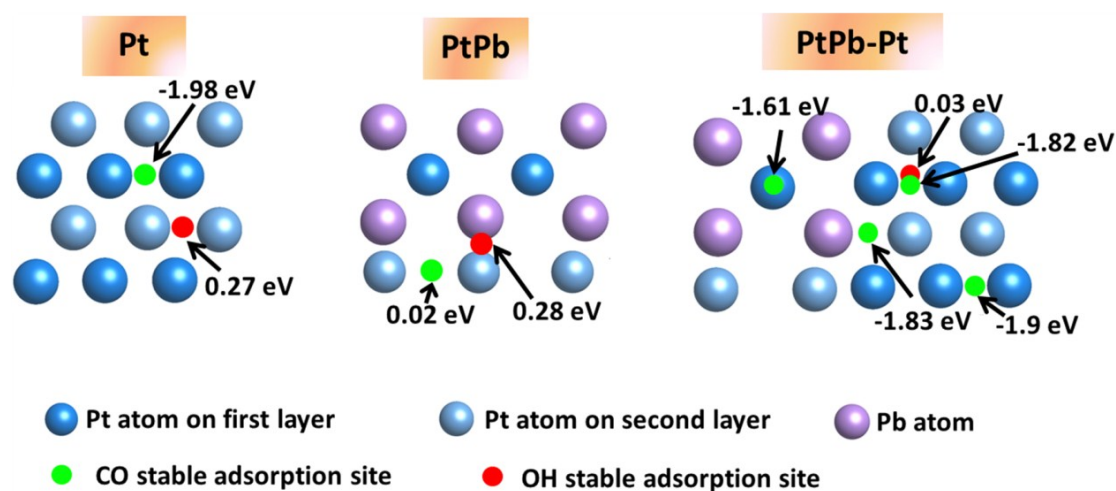

**Fig. S7.** The model of Pt surface, intermetallic PtPb surface and interface of PtPb-Pt (C/A interface) for DFT simulation. The most stable CO and OH adsorptions on different sites were screened and the adsorption energy on these three kinds of surface is labeled in the schematic.

## Tables

**Table S1.** The full width at half maximum (FWHM) of PtPb NPs before and after ion irradiation from PXRD spectrum.

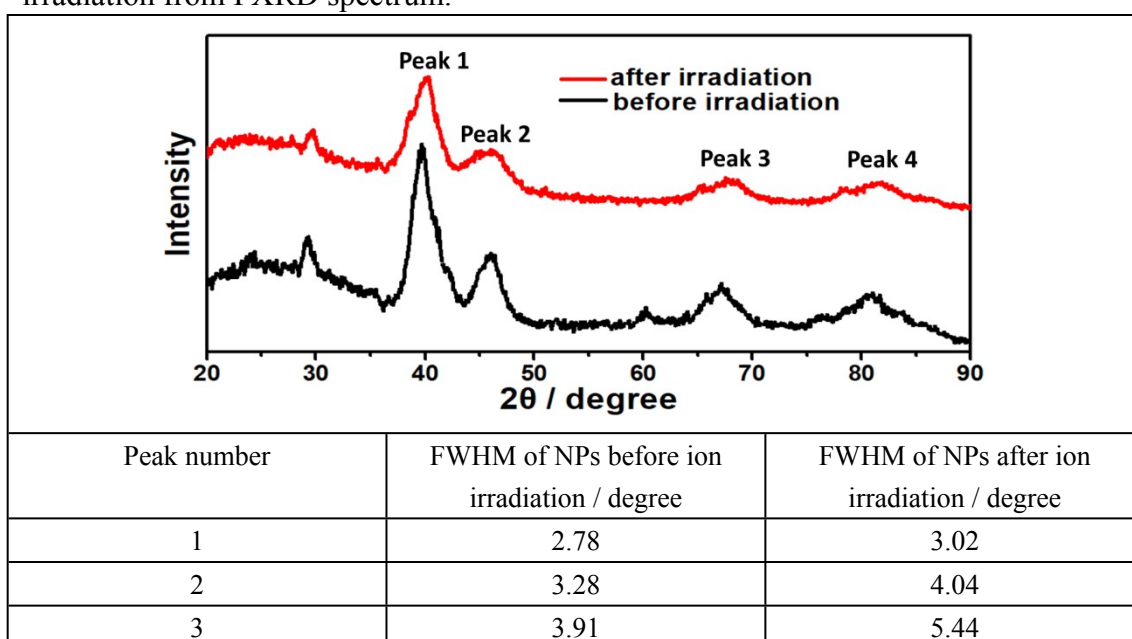

|   |      |      |
|---|------|------|
| 4 | 6.05 | 6.76 |
|---|------|------|

**Table S2.** MOR activities of different catalysts. MOR measurements were performed in 0.1 M HClO<sub>4</sub>+0.1 M methanol at a scan rate of 50 mV /s.

| Catalyst   | Specific activity (mA/cm <sup>2</sup> Pt) | Mass activity (A/mg Pt) |
|------------|-------------------------------------------|-------------------------|
| Pt /C      | 0.78                                      | 0.36                    |
| PtPb /C    | 2.30                                      | 0.96                    |
| PtPb-CA /C | 4.32                                      | 1.31                    |
| PtPb-A /C  | 1.76                                      | 0.77                    |

**Table S3.** Dehydrogenation reaction energy ( $\Delta E$ ) of intermediates in Pt surface, PtPb-Pt interface (C/A interface) and PtPb surface in MOR. The  $\Delta E$  of deep dehydrogenation steps on Pt surface and PtPb-Pt interface were further compared to see the thermal stability differences.

| Reaction                              | Reaction energy (eV) |                            |       |
|---------------------------------------|----------------------|----------------------------|-------|
|                                       | Pt                   | PtPb-Pt<br>(C/A interface) | PtPb  |
| CH <sub>3</sub> OH→CH <sub>2</sub> OH | -0.62                | -0.77                      | -0.35 |
| CH <sub>2</sub> OH→CH <sub>2</sub> O  | -0.21                | -0.42                      | -0.04 |
| CH <sub>3</sub> OH→CH <sub>3</sub> O  | -0.19                | 0.17                       | 0.25  |
| CH <sub>3</sub> O→CH <sub>2</sub> O   | -0.64                | -1.24                      | -0.64 |
| CH <sub>2</sub> OH→CHOH               | -0.23                | 0.14                       | -     |
| CH <sub>2</sub> O→CHO                 | -0.60                | -0.82                      | -     |
| CHOH→COH                              | -0.83                | 0.66                       | -     |
| COH→CO                                | -0.95                | -1.06                      | -     |

**Table S4.** CO and OH adsorption energy of atoms in Pt surface, PtPb-Pt interface (C/A interface) and PtPb surface.

| Adsorbate | Adsorption energy (eV) |                            |      |
|-----------|------------------------|----------------------------|------|
|           | Pt                     | PtPb-Pt<br>(C/A interface) | PtPb |
| CO        | -1.98                  | -1.61                      | 0.02 |
| OH        | 0.27                   | 0.03                       | 0.28 |
